# Supplementary material
Source: Springer Nature journal article supplement (https://www.springermedizin.de/resource/supplementary/12879_2013_2574_MOESM1_ESM.pdf/9444832)
Supplement: MOESM1 [file 9444832]

Enrolled N=4659  
Total vaccinated cohort N=4656  
Completed study n=4597  
Per-protocol immunogenicity sub-cohort n=2951

[Unknown completion status n=2]  
*Withdrawals:*  
Consent withdrawal n=17  
Lost to follow-up n=22  
SAE n=13  
Non-serious AE n=1  
Exclusion criteria not met after enrolment n=1  
Not reachable via telephone n=2  
Wrong treatment schedule n=1

**QIV**

Total vaccinated cohort  
n=3036

*Eliminations:*

Administration of protocol-forbidden vaccine n=8  
Randomization failure n=4  
Study vaccine not administered according to protocol n=1  
Protocol violation (inclusion/exclusion criteria) n=7  
Non-compliance with blood sampling schedule n=25  
Essential serological data missing n=20  
[Unknown completion status n=2]

Per-protocol immunogenicity cohort n=2971

Per-protocol immunogenicity sub-cohort n=1809

**TIV-Vic**

Total vaccinated cohort  
n=1010

*Eliminations:*

Administration of protocol-forbidden vaccine n=1  
Randomization failure n=1  
Protocol violation (inclusion/exclusion criteria) n=5  
Non-compliance with blood sampling schedule n=7  
Essential serological data missing n=5

Per-protocol immunogenicity cohort n=991

Per-protocol immunogenicity sub-cohort n=608

**TIV-Yam**

Total vaccinated cohort  
n=610

*Eliminations:*

Administration of protocol-forbidden vaccine n=2  
Randomization failure n=1  
Protocol violation (inclusion/exclusion criteria) n=2  
Non-compliance with blood sampling schedule n=6  
Essential serological data missing n=5  
[Unknown completion status n=1]

Per-protocol immunogenicity cohort n=594

Per-protocol immunogenicity sub-cohort n=534
